# Supplementary material for: Integration of Shallow Gradients of Shh and Netrin-1 Guides Commissural Axons
Source: PLoS Biol. 2015 Mar 31;13(3):e1002119. doi: 10.1371/journal.pbio.1002119 (PMC4380419; doi:10.1371/journal.pbio.1002119)
Supplement: S1 Table — Using previously published images from mice genetically deficient for Netrin-1 (Netrin-1 -/- and DCC -/-) or Shh (Wnt1-Cre;Smo null/conditional and Boc -/-) signaling, we determined at what relative position along the spinal cord guidance defects occur for commissural axons by measuring the relative distance from the floor plate to the roof plate at which misguided axons begin to deviate from their normal trajectory. We used these relative distances to define the range of guidance errors. (XLSX) [file pbio.1002119.s005.xlsx]

## Sheet: Sheet1
Genotype	Range of guidance error; (Relative distance from the floor plate to the roof plate)	Reference
Netrin-1-/-	0.37 – 0.6	Serafini et al 1996
DCC-/-	0.35 – 0.49	Fazeli et al 1997
Wnt1-Cre; Smonull/conditional	0.43 – 0.47	Charron et al 2003
Boc-/-	0.41 – 0.56	Okada et al 2006
